# Supplementary material for: 3D printed microfluidic devices for lipid bilayer recordings
Source: Royal Society of Chemistry journal article supplement (doi:10.1039/d1lc01077h), 2022-01-01
Supplement: d1lc01077h1.pdf [file d1lc01077h1.pdf]

Supplementary information

## **3D printed microfluidic devices for lipid bilayer recordings**

Kazuto Ogishi, Toshihisa Osaki, Yuya Morimoto and Shoji Takeuchi

---

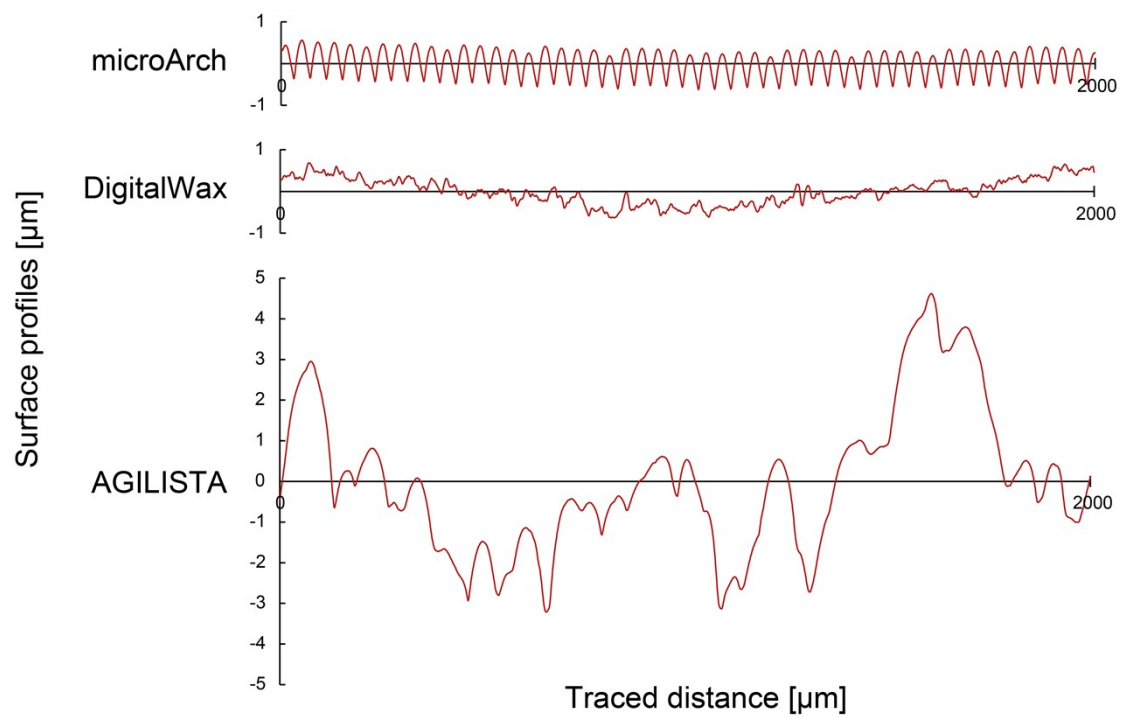

Figure S1: Representative surface profiles of the separators fabricated by 3D printers.

---

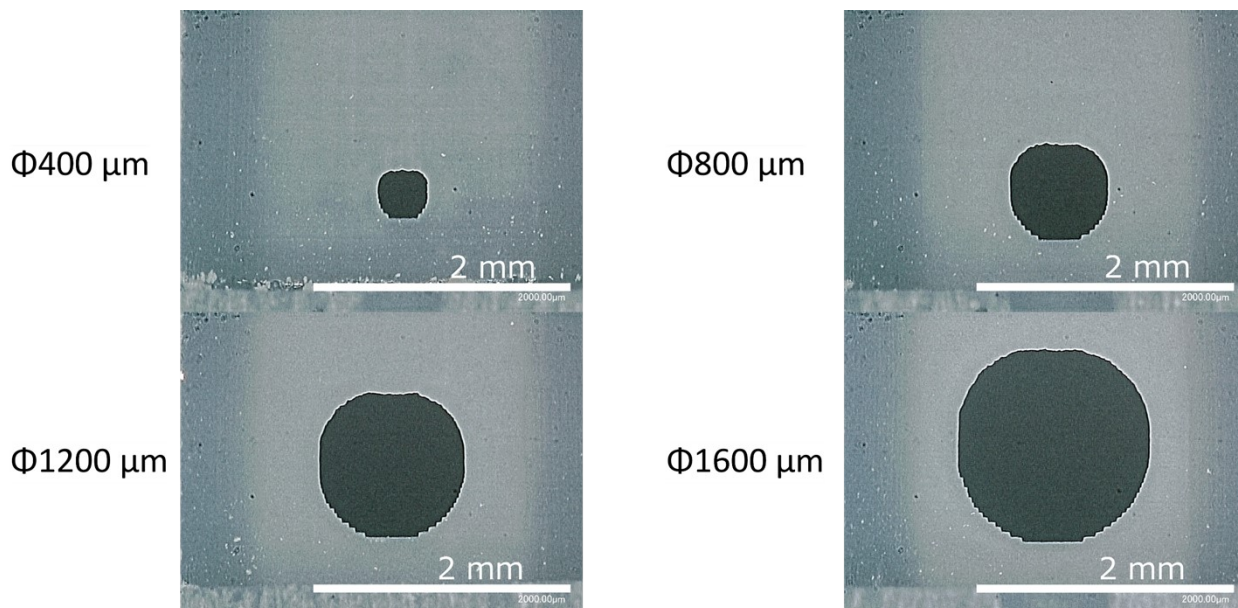

Figure S2: Front views of the separators made by the DigitalWax printer.

---

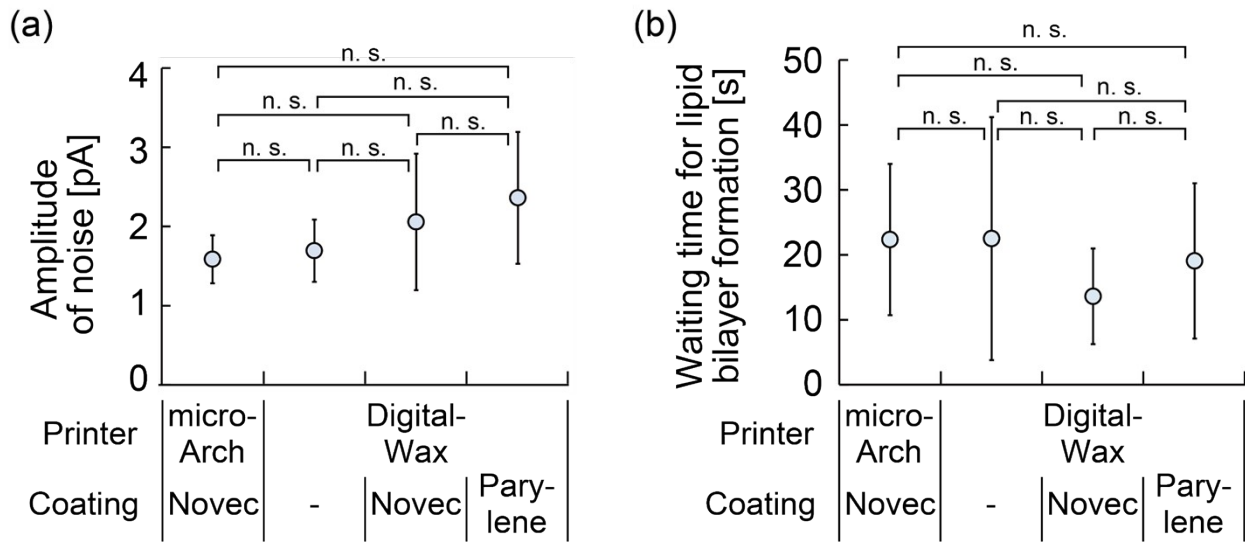

Figure S3: (a) Relationship between the electrical noise and the combination of device materials ( $W = 200 \mu\text{m}$ ,  $D = 800 \mu\text{m}$ ) ( $n = 5$ ). (b) Relationship between the waiting time for a lipid bilayer formation and the combination of device materials ( $W = 200 \mu\text{m}$ ,  $D = 800 \mu\text{m}$ ) ( $n > 9$ ). Error bars represent standard deviation. The significance was assessed by evaluating the pairwise differences among the mean values using Tukey-Kramer test. \* $p < 0.05$ , n.s. not significant. Applied voltage: 50 mV.  $\alpha\text{HL}$  concentration: 100 nM.
